# Supplementary material for: The effect of COVID-19 lockdown on lifestyle and mood in Croatian general population: a cross-sectional study
Source: PubMed Central journal article supplement (PMC7480750; doi:10.3325/cmj.2020.61.309), 2020-08
Supplement: CroatMedJ_61_s001.pdf [file CroatMedJ_61_s001.pdf]

## Supplementary Material

The study questionnaire about lifestyle habits and mood changes before and during the COVID-19 quarantine including Demographics, Lifestyle habits and Mood self-assessment section

| <b>THE DEMOGRAPHICS SECTION</b>                                                                   |                                              |                           |                                                 |                                   |                                     |                                                          |       |
|---------------------------------------------------------------------------------------------------|----------------------------------------------|---------------------------|-------------------------------------------------|-----------------------------------|-------------------------------------|----------------------------------------------------------|-------|
| <b>Year of birth</b>                                                                              |                                              |                           |                                                 |                                   |                                     |                                                          |       |
| <b>Gender</b>                                                                                     | Male                                         |                           |                                                 | Female                            |                                     | Other                                                    |       |
| <b>Please, type the name of the city you currently (during the pandemic) live in.</b>             |                                              |                           |                                                 |                                   |                                     |                                                          |       |
| <b>Please, indicate the highest level of your current education.</b>                              | Elementary school                            | High school               | College                                         | Bachelor degree                   | Master degree                       | PhD                                                      |       |
| <b>Please, indicate your current employment status.</b>                                           | Employed (full or part time)                 | Unemployed                | Retired                                         | Sick leave                        | Maternity leave                     |                                                          |       |
| <b>If you are currently employed, how are you working?</b>                                        | I am working in similar conditions as before | I am working from home    | I am working in rotating shifts due to pandemic | I work part time due to pandemic  | Other                               |                                                          |       |
| <b>For how long have you been working in this manner (days)?</b>                                  |                                              |                           |                                                 |                                   |                                     |                                                          |       |
| <b>Who do you live with during the COVID-19 pandemic?</b>                                         | Alone                                        | With partner and children | With children                                   | With a partner                    | With a roommate                     | With family including partner, children and grandparents | Other |
| <b>Please, indicate how strictly are you following the restrictions due to COVID-19 pandemic?</b> | Not at all                                   |                           | Occasionally I do follow them                   | Most of the time I do follow them | I am following all the restrictions |                                                          |       |
| <b>Please, indicate your body mass in kilograms.</b>                                              |                                              |                           |                                                 |                                   |                                     |                                                          |       |
| <b>During the quarantine, you have:</b>                                                           | lost weight                                  |                           |                                                 | gained weight                     |                                     | remained the same weight                                 |       |
| <b>Please, indicate your height in centimeters.</b>                                               |                                              |                           |                                                 |                                   |                                     |                                                          |       |

| <b>THE LIFESTYLE HABITS SECTION</b>                                                          |                      |                      |                         |                         |                          |                              |       |
|----------------------------------------------------------------------------------------------|----------------------|----------------------|-------------------------|-------------------------|--------------------------|------------------------------|-------|
| <b>Do you smoke cigarettes?</b>                                                              | Yes                  |                      |                         | No                      |                          |                              |       |
| <b>If yes, for how long have you been smoking cigarettes?</b>                                | Less than a year     | 1 to 5 years         | 5 to 10 years           | 10 to 20 years          | Over 20 years            |                              |       |
| <b>If yes, have you been smoking more cigarettes DURING the quarantine?</b>                  | Yes                  |                      |                         | No                      |                          |                              |       |
| <b>How many cigarettes have you been smoking per day BEFORE the quarantine?</b>              |                      |                      |                         |                         |                          |                              |       |
| <b>How many cigarettes are you smoking per day DURING the quarantine?</b>                    |                      |                      |                         |                         |                          |                              |       |
| <b>Do you drink coffee?</b>                                                                  | Yes                  |                      |                         | No                      |                          |                              |       |
| <b>If yes, how many cups of coffee have you been drinking per day BEFORE the quarantine?</b> |                      |                      |                         |                         |                          |                              |       |
| <b>If yes, how many cups of coffee have you been drinking per day DURING the quarantine?</b> |                      |                      |                         |                         |                          |                              |       |
| <b>How many alcoholic drinks have you been drinking BEFORE the quarantine?</b>               | None                 | One in a month       | Up to 3 drinks per week | Up to 7 drinks per week | Up to 15 drinks per week | More than 15 drinks per week | Other |
| <b>How many alcoholic drinks have you been drinking DURING the quarantine?</b>               | None                 | One in a month       | Up to 3 drinks per week | Up to 7 drinks per week | Up to 15 drinks per week | More than 15 drinks per week | Other |
| <b>Have you been exercising BEFORE the quarantine?</b>                                       | Yes                  |                      |                         | No                      |                          |                              |       |
| <b>If yes, how often have you been exercising BEFORE the quarantine?</b>                     | Daily                | 1-2 times per month  | 1-2 times per week      | 2-3 times per week      | 4-5 times per week       |                              |       |
| <b>If yes, for how many minutes per day did you exercise?</b>                                |                      |                      |                         |                         |                          |                              |       |
| <b>Have you been exercising DURING the quarantine?</b>                                       | Yes                  |                      |                         | No                      |                          |                              |       |
| <b>If yes, how often do you exercise DURING the quarantine?</b>                              | Daily                | 1-2 times per month  | 1-2 times per week      | 2-3 times per week      | 4-5 times per week       |                              |       |
| <b>If yes, for how many minutes per day do you exercise?</b>                                 |                      |                      |                         |                         |                          |                              |       |
| <b>BEFORE the quarantine, how many hours per day did you spend:</b>                          |                      |                      |                         |                         |                          |                              |       |
| <b>Watching TV?</b>                                                                          | Less than 30 minutes | 30 minutes to 1 hour | 1 to 2 hours            | 2 to 3 hours            | 3 to 4 hours             | More than 4 hours            |       |
| <b>Using the computer?</b>                                                                   |                      |                      |                         |                         |                          |                              |       |
| <b>On social networks (e.g. WhatsApp, Instagram, Viber, Messenger)?</b>                      |                      |                      |                         |                         |                          |                              |       |
| <b>Talking on your cell phone?</b>                                                           |                      |                      |                         |                         |                          |                              |       |
| <b>DURING the quarantine, how many hours per day do you spend:</b>                           |                      |                      |                         |                         |                          |                              |       |
| <b>Watching TV?</b>                                                                          | Less than 30 minutes | 30 minutes to 1 hour | 1 to 2 hours            | 2 to 3 hours            | 3 to 4 hours             | More than 4 hours            |       |
| <b>Using the computer?</b>                                                                   |                      |                      |                         |                         |                          |                              |       |
| <b>On social networks (e.g. WhatsApp, Instagram, Viber, Messenger)?</b>                      |                      |                      |                         |                         |                          |                              |       |
| <b>Talking on your cell phone?</b>                                                           |                      |                      |                         |                         |                          |                              |       |

| <b>THE MOOD SELF-ASSESSMENT SECTION</b>               |            |          |            |              |
|-------------------------------------------------------|------------|----------|------------|--------------|
| <b>Before the quarantine, how often did you feel:</b> |            |          |            |              |
| <b>Calm?</b>                                          | Not at all | Somewhat | Moderately | Very much so |
| <b>Rested?</b>                                        |            |          |            |              |
| <b>Content?</b>                                       |            |          |            |              |
| <b>Anxious (tense, preoccupied)?</b>                  |            |          |            |              |
| <b>Angry (irritable)?</b>                             |            |          |            |              |
| <b>Scared?</b>                                        |            |          |            |              |
| <b>Discouraged about the future?</b>                  |            |          |            |              |
| <b>Sad?</b>                                           |            |          |            |              |
| <b>During the quarantine, how often do you feel:</b>  |            |          |            |              |
| <b>Calm?</b>                                          | Not at all | Somewhat | Moderately | Very much so |
| <b>Rested?</b>                                        |            |          |            |              |
| <b>Content?</b>                                       |            |          |            |              |
| <b>Anxious (tense, preoccupied)?</b>                  |            |          |            |              |
| <b>Angry (irritable)?</b>                             |            |          |            |              |
| <b>Scared?</b>                                        |            |          |            |              |
| <b>Discouraged about the future?</b>                  |            |          |            |              |
| <b>Sad?</b>                                           |            |          |            |              |
